# Supplementary material for: Antifungal Potential of Nanostructured Crystalline Copper and Its Oxide Forms
Source: MDPI journal article supplement (doi:10.3390/nano10051003), 2020-05-24
Supplement: s1 [file s1]

## Antifungal Potential of Nanostructured Crystalline Copper and Its Oxide Forms

Auriane Fifame Oussou-Azo <sup>1</sup>, Tomoki Nakama <sup>2</sup>, Masayuki Nakamura <sup>1,2</sup>, Taiki Futagami <sup>1,2</sup> and Mun'delanji Catherine M. Vestergaard <sup>1,2,\*</sup>

<sup>1</sup> United Graduate School of Agricultural Sciences, Kagoshima University, Kagoshima 890-0065, Japan; oauriane1@gmail.com (A.F.O.-A.); masa@agri.kagoshima-u.ac.jp (M.N.); futagami@chem.agri.kagoshima-u.ac.jp (T.F.)

<sup>2</sup> Faculty of Agriculture, Kagoshima University, 1-21-24 Korimoto, Kagoshima 890-0065, Japan; nt1liver@gmail.com (T.N.)

\* Correspondence: munde@agri.kagoshima-u.ac.jp

**Alamar Blue (AB) assay optimization:** Five densities of pathogen conidia suspension ( $10^1$  to  $10^5$  spores/mL) were incubated at four different periods of time (6, 12, 18 and 24 h) using potato dextrose broth (PDB) and 10 % (v/v) V8 juice broth. The type of medium, the spore density and the incubation time, all significantly ( $P < 0.05$ ) affected the percent reduction of AB, and consequently, the pathogen's proliferation (Table S1). Regardless of incubation time, 10 % (v/v) V8 broth ensured a better proliferation of the pathogen than PDB at all spore densities (Figure S1). However, AB reduction in PDB had a steadier gradient, increasing from -20 to 60 along with the cell density. In the case of, 10 % V8 broth, reduction of AB only increased from 60 to 80, with decreases seen between  $10^1$ - $10^2$  spores/mL and  $10^3$ - $10^4$  spores/mL. These observations are in agreement with the visual inspection of the plates (Figure S2), where the dye turned from blue to pink only after 6 h of sample incubation and to light pink at 18 h. This may explain why there was a quick start of a second redox phase of AB in 10 % V8 broth. Based on these results, PDB was selected for AB assay. In PDB, the effective color change of AB occurred after 18 h of incubation, but the highest gradient was observed after 24 h ( $R^2 = 0.735$  vs  $R^2 = 0.435$  at 18 h) with the calibration curve being linear between  $10^2$  to  $10^5$  spores/mL. Consequently, we chose 24 h of incubation time and  $10^5$  spore density for the AB assay experiments on the effect of the various copper forms with on the target pathogen.

**Table S1.** Effects of spore density, medium and incubation period on percent reduction of Alamar Blue dye (Analysis of variance, NOVA test)

| Variables         | df | F    | Significance |
|-------------------|----|------|--------------|
| Incubation period | 3  | 8.4  | < 0.05       |
| Type of Media     | 1  | 35.5 | < 0.05       |
| Spore Density     | 4  | 10.2 | < 0.05       |

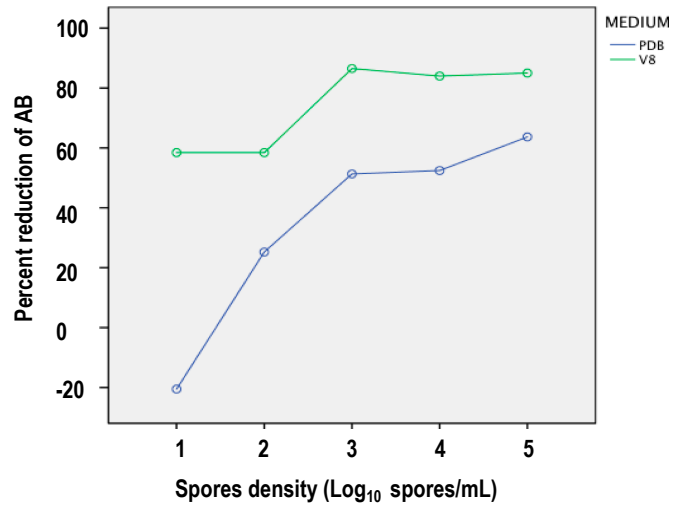

**Figure S1.** Effects of spore density and type of media on percent reduction of Alamar Blue dye.

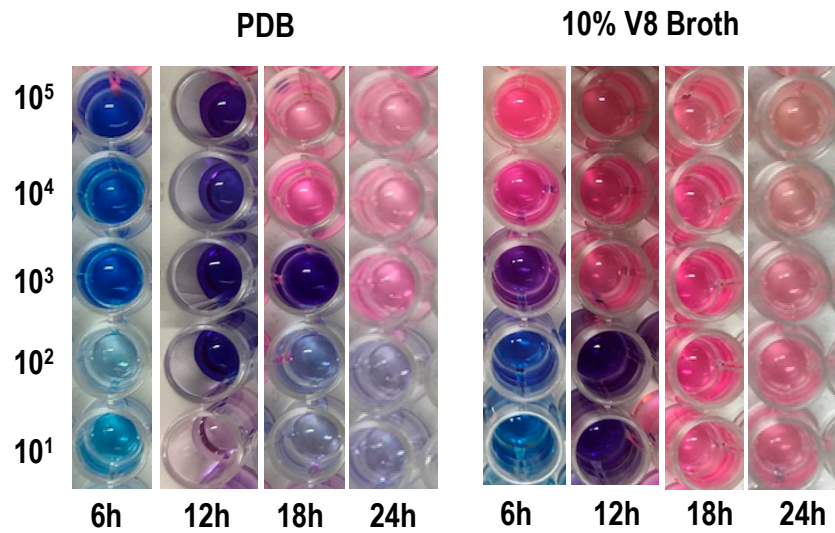

**Figure S2.** Effects of spore density, medium and incubation period on visual color change of Alamar Blue dye.
